# Supplementary material
Source: PubMed Central journal article supplement (PMC3073179)
Supplement: viru0102_0072SD2.pdf [file viru0102_0072SD2.pdf]

**Supp Table 1. *B. anthracis* down-regulated genes sharing a common motif.**

| <u>Locus</u> <sup>c</sup> | <u>Gene Name</u>                                             | <u>Location</u> <sup>a</sup> | <u>Motif Sequence</u> <sup>b</sup> |
|---------------------------|--------------------------------------------------------------|------------------------------|------------------------------------|
| --                        | DEME Consensus Motif                                         | --                           | <b>TGTGATAAAATGTCAC</b>            |
| BA2125                    | respiratory nitrate reductase, alpha subunit ( <i>narG</i> ) | 67-81                        | <b>TGTGCGAAATGTCAC</b>             |
| BA2133                    | molybdenum cofactor biosynthesis protein A ( <i>narA-1</i> ) | 87-101                       | <b>TGTGAGAAAAGTCAC</b>             |
| BA2146                    | nitrite reductase [NAD(P)H], large subunit ( <i>nirB</i> )   | 79-93                        | <b>TGTGATAAAATATCAC</b>            |
| BA3497                    | prismane protein, hydroxylamine reductase                    | 65-79                        | <b>TGTGATTCATATCAC</b>             |
| BA3663                    | anaerobic ribonucleoside-triphosphate reductase              | 68-82                        | <b>TGTGAGAAATGTAA</b>              |

<sup>a</sup> upstream location relative to the translation initiation codon.

<sup>b</sup> Nucleotides in upper case indicate a match to the consensus motif.

<sup>c</sup> Locus based on Ames strain of *B. anthracis*.
